# Supplementary material for: Two temperature-induced 1D CuII chain enantiomeric pairs showing different magnetic properties and nonlinear optical responses
Source: Royal Society of Chemistry journal article supplement (doi:10.1039/d2dt03787d), 2023-01-01
Supplement: d2dt03787d1.pdf [file d2dt03787d1.pdf]

## Supporting Information for

### Two temperature-induced 1D Cu<sup>II</sup> chain enantiomeric pairs showing different magnetic properties and nonlinear optical responses

Xi-Li Li,\* Yanan Li, Ailing Wang, Congli Gao, Minghui Cui, Cai-Ming Liu\* and Liming Zhou\*

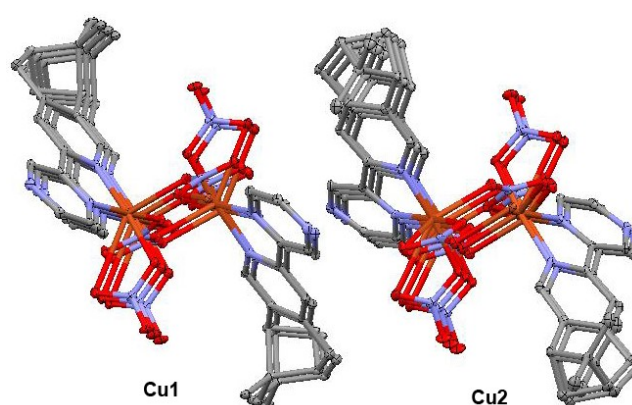

**Fig. S1.** The topologies of 1D helical Cu1 and Cu2 chains in *S*-1-Cu running along the crystallographic *b*-axis. Color code: Cu, orange; N, blue; O, red; C, gray. H atoms are omitted for clarity.

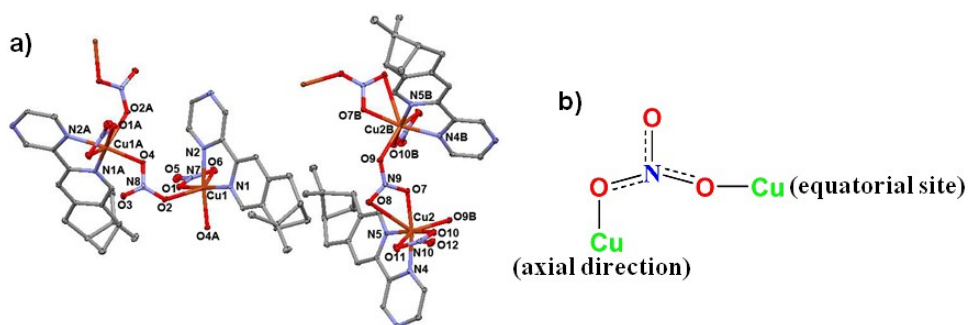

**Fig. S2.** (a) The coordination fashions of Cu<sup>II</sup> ions in *S*-1-Cu (symmetry codes: A =  $-x, y + 1/2, -z$ ; B =  $-x + 1, y + 1/2, -z + 1$ ), and H atoms are removed for clarity. (b) The bridging fashion of the NO<sub>3</sub><sup>-</sup> anion in *S*-1-Cu.

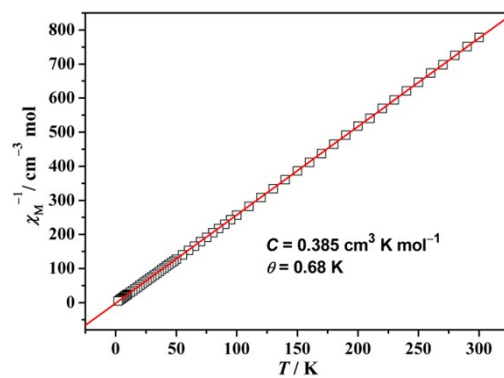

**Fig. S3.**  $\chi_M^{-1}$  vs.  $T$  plot of **S-1-Cu**, the solid red lines represent the best fitting to the data.

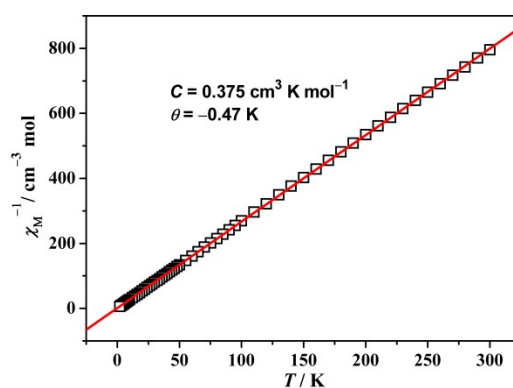

**Fig. S4.**  $\chi_M^{-1}$  vs.  $T$  plot of **S-2-Cu**, the solid red lines represent the best fitting to the data.

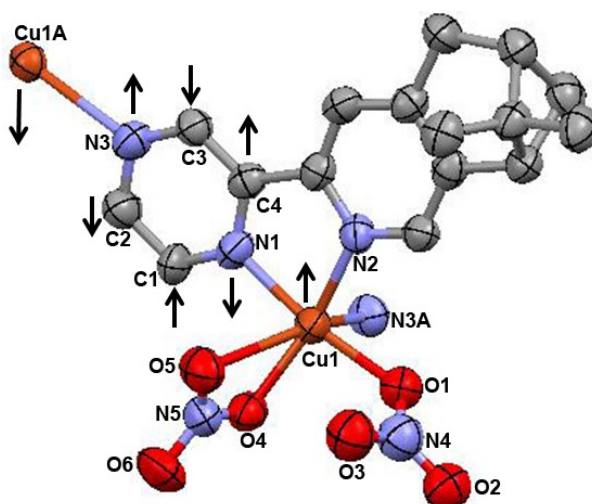

**Fig. S5.** Schematic representation of the spin polarization mechanism between two adjacent  $\text{Cu}^{\text{II}}$  spin centers bridged by a pyrazine (pyz) moiety in **S-2-Cu**.

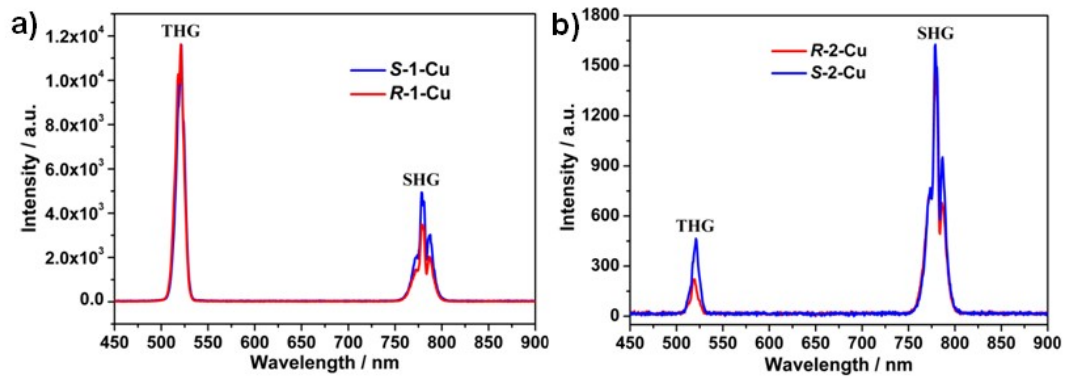

**Fig. S6** THG and SHG spectra of *S-1-Cu/R-1-Cu* (a) and *S-2-Cu/R-2-Cu* (b) based on crystalline samples under excitation at  $\lambda = 1550$  nm ( $T_{\text{int}} = 0.5$  s).

**Table S1** Crystallographic data and structure refinement parameters for **S-1-Cu/ R-1-Cu** and **S-2-Cu/R-2-Cu** enantiomeric pairs.

| Complex                                                                    | <b>R-1-Cu</b>                                                    | <b>S-1-Cu</b>                                                    | <b>R-2-Cu</b>                                                    | <b>S-2-Cu</b>                                                    |
|----------------------------------------------------------------------------|------------------------------------------------------------------|------------------------------------------------------------------|------------------------------------------------------------------|------------------------------------------------------------------|
| Chemical formula                                                           | C <sub>16</sub> H <sub>17</sub> N <sub>5</sub> O <sub>6</sub> Cu | C <sub>16</sub> H <sub>17</sub> N <sub>5</sub> O <sub>6</sub> Cu | C <sub>16</sub> H <sub>17</sub> N <sub>5</sub> O <sub>6</sub> Cu | C <sub>16</sub> H <sub>17</sub> N <sub>5</sub> O <sub>6</sub> Cu |
| Formula weight                                                             | 438.88                                                           | 438.88                                                           | 438.88                                                           | 438.88                                                           |
| Crystal system                                                             | monoclinic                                                       | monoclinic                                                       | orthorhombic                                                     | orthorhombic                                                     |
| Space group                                                                | <i>P</i> 2 <sub>1</sub>                                          | <i>P</i> 2 <sub>1</sub>                                          | <i>P</i> 2 <sub>1</sub> 2 <sub>1</sub> 2 <sub>1</sub>            | <i>P</i> 2 <sub>1</sub> 2 <sub>1</sub> 2 <sub>1</sub>            |
| <i>a</i> (Å)                                                               | 10.4167(9)                                                       | 10.4166(9)                                                       | 11.307(3)                                                        | 10.5166(3)                                                       |
| <i>b</i> (Å)                                                               | 9.0382(8)                                                        | 9.0426(8)                                                        | 12.101(3))                                                       | 12.0542(5)                                                       |
| <i>c</i> (Å)                                                               | 19.3517(16)                                                      | 19.3600(18)                                                      | 13.657(3)                                                        | 14.3380(4)                                                       |
| $\beta$ (deg)                                                              | 105.2740(10)                                                     | 105.247(2)                                                       | $\alpha = \beta = \gamma = 90$                                   | $\alpha = \beta = \gamma = 90$                                   |
| <i>V</i> (Å <sup>3</sup> )                                                 | 1757.6(3)                                                        | 1759.4(3)                                                        | 1868.6(8)                                                        | 1817.62(10)                                                      |
| <i>Z</i>                                                                   | 4                                                                | 4                                                                | 4                                                                | 4                                                                |
| <i>D</i> <sub>c</sub> (g cm <sup>-3</sup> )                                | 1.659                                                            | 1.657                                                            | 1.560                                                            | 1.604                                                            |
| $\mu$ (mm <sup>-1</sup> )                                                  | 1.290                                                            | 1.289                                                            | 1.213                                                            | 2.115                                                            |
| F(000)                                                                     | 900                                                              | 900                                                              | 900                                                              | 900                                                              |
| Reflections collected                                                      | 16980                                                            | 17024                                                            | 9089                                                             | 7422                                                             |
| Independent reflections                                                    | 7876                                                             | 8143                                                             | 4285                                                             | 2782                                                             |
| Data/restraints/parameters                                                 | 7876/1/510                                                       | 8143/1/510                                                       | 4285/0/256                                                       | 2782/0/256                                                       |
| GOF                                                                        | 1.011                                                            | 1.033                                                            | 1.034                                                            | 1.100                                                            |
| <i>R</i> <sub>1</sub> [ <i>I</i> > 2 $\sigma$ ( <i>I</i> )] <sup>a</sup>   | 0.0416                                                           | 0.0453                                                           | 0.0472                                                           | 0.0451                                                           |
| w <i>R</i> <sub>2</sub> [ <i>I</i> > 2 $\sigma$ ( <i>I</i> )] <sup>b</sup> | 0.0798                                                           | 0.0911                                                           | 0.1191                                                           | 0.1009                                                           |
| Flack parameter                                                            | 0.033(14)                                                        | 0.020(15)                                                        | 0.02(2)                                                          | 0.03(5)                                                          |
| CCDC                                                                       | 2216907                                                          | 2216908                                                          | 2216909                                                          | 2216910                                                          |

$${}^a R_1 = \sum ||F_o| - |F_c|| / \sum |F_o|, \quad {}^b wR_2 = [\sum w(F_o^2 - F_c^2)^2 / \sum w(F_o^2)^2]^{1/2}$$

**Table S2** Selected bond lengths (Å) for ***R-1-Cu/S-1-Cu*** and ***R-2-Cu/S-2-Cu***.

| Bond lengths for <b><i>R-1-Cu</i></b> |          |             |          |             |          |
|---------------------------------------|----------|-------------|----------|-------------|----------|
| Cu(1)—O(1)                            | 1.966(4) | Cu(1)—O(2)  | 2.000(3) | Cu(1)—O(4A) | 2.238(3) |
| Cu(2)—O(7)                            | 1.990(3) | Cu(2)—O(10) | 1.975(3) | Cu(2)—O(9B) | 2.309(3) |
| Cu(1)—N(1)                            | 1.982(4) | Cu(1)—N(2)  | 2.005(4) | Cu(2)—N(4)  | 2.004(4) |
| Cu(2)—N(5)                            | 2.010(3) |             |          |             |          |

Symmetry Codes for A:  $-x, y - 1/2, -z + 1$ ; B:  $-x + 1, y + 1/2, -z + 2$ 

| Bond lengths for <b><i>S-1-Cu</i></b> |          |             |          |             |          |
|---------------------------------------|----------|-------------|----------|-------------|----------|
| Cu(1)—O(1)                            | 1.977(4) | Cu(1)—O(2)  | 2.317(3) | Cu(1)—O(4A) | 2.418(4) |
| Cu(2)—O(7)                            | 2.002(4) | Cu(2)—O(10) | 1.969(4) | Cu(2)—O(9B) | 2.281(3) |
| Cu(1)—N(1)                            | 2.010(5) | Cu(1)—N(2)  | 2.008(4) | Cu(2)—N(4)  | 2.003(4) |
| Cu(2)—N(5)                            | 1.989(4) |             |          |             |          |

Symmetry Codes for A:  $-x, y + 1/2, -z$ ; B:  $-x + 1, y + 1/2, -z + 1$ 

| Bond lengths for <b><i>R-2-Cu</i></b> |          |             |          |            |          |
|---------------------------------------|----------|-------------|----------|------------|----------|
| Cu(1)—O(1)                            | 1.974(4) | Cu(1)—O(4)  | 1.978(4) | Cu(1)—N(1) | 1.994(4) |
| Cu(1)—N(2)                            | 2.000(4) | Cu(1)—N(3A) | 2.350(4) |            |          |

Symmetry Codes for A:  $x + 1/2, -y + 1/2, -z + 2$ 

| Bond lengths for <b><i>S-2-Cu</i></b> |          |             |          |            |          |
|---------------------------------------|----------|-------------|----------|------------|----------|
| Cu(1)—O(1)                            | 1.965(3) | Cu(1)—O(4)  | 1.986(3) | Cu(1)—N(1) | 2.007(3) |
| Cu(1)—N(2)                            | 1.999(4) | Cu(1)—N(3A) | 2.535(6) |            |          |

Symmetry Codes for A:  $x + 1/2, -y + 1/2, -z + 2$

**Table S3** Selected bond angles (°) for *R-1-Cu/S-1-Cu* and *R-2-Cu/S-2-Cu*.

| Bond angles for <i>R-1-Cu</i> |           |                  |           |                 |            |
|-------------------------------|-----------|------------------|-----------|-----------------|------------|
| O(1)-Cu(1)-O(2)               | 90.47(14) | O(1)-Cu(1)-N(2)  | 93.86(16) | O(2)-Cu(1)-N(1) | 93.50(15)  |
| N(1)-Cu(1)-N(2)               | 81.41(17) | O(7)-Cu(2)-O(10) | 90.00(13) | O(7)-Cu(2)-N(5) | 92.44(14)  |
| O(10)-Cu2-N(4)                | 95.82(14) | N(4)-Cu(2)-N(5)  | 81.54(15) |                 |            |
| Bond angles for <i>S-1-Cu</i> |           |                  |           |                 |            |
| O(1)-Cu(1)-O(2)               | 84.14(14) | O(1)-Cu(1)-N(2)  | 95.95(17) | O(2)-Cu(1)-N(1) | 100.51(15) |
| N(1)-Cu(1)-N(2)               | 81.49(18) | O(7)-Cu(2)-O(10) | 90.16(15) | O(7)-Cu(2)-N(5) | 93.24(16)  |
| O(10)-Cu2-N(4)                | 94.57(16) | N(4)-Cu(2)-N(5)  | 81.35(17) |                 |            |
| Bond angles for <i>R-2-Cu</i> |           |                  |           |                 |            |
| O(1)-Cu(1)-O(4)               | 88.76(15) | O(4)-Cu(1)-N(1)  | 96.57(16) | O(1)-Cu(1)-N(2) | 94.19(15)  |
| N(1)-Cu(1)-N(2)               | 80.47(16) |                  |           |                 |            |
| Bond angles for <i>S-2-Cu</i> |           |                  |           |                 |            |
| O(1)-Cu(1)-O(4)               | 92.43(14) | O(4)-Cu(1)-N(1)  | 93.87(17) | O(1)-Cu(1)-N(2) | 96.11(15)  |
| N(1)-Cu(1)-N(2)               | 80.72(18) |                  |           |                 |            |
